# Supplementary material for: Modelling tree ring cellulose δ 18 O variations in two temperature-sensitive tree species from North and South America
Source: Copernicus journal article supplement (doi:10.5194/cp-13-1515-2017), 2017-11-10
Supplement: Supplementary file 1 [file cp-13-1515-2017-supplement.pdf]

Supplement of Clim. Past, 13, 1515–1526, 2017  
<https://doi.org/10.5194/cp-13-1515-2017-supplement>  
© Author(s) 2017. This work is distributed under  
the Creative Commons Attribution 4.0 License.

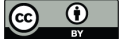

*Supplement of*

## **Modelling tree ring cellulose $\delta^{18}\text{O}$ variations in two temperature-sensitive tree species from North and South America**

**Aliénor Lavergne et al.**

*Correspondence to:* Aliénor Lavergne (a.lavergne@imperial.ac.uk) and Fabio Gennaretti (fabio.gennaretti@inra.fr)

The copyright of individual parts of the supplement might differ from the CC BY 4.0 License.

## Supplement

1  
2  
3  
4  
5  
6  
7  
8  
9

**Figure S1** Daily local mean temperature variations (black; La Almohadilla site at 41°11'S-71°47'W, data measured and provided by IANIGLA) against maximum (red) and minimum (blue) temperature from NOAA reanalysis corrected to respect the monthly mean values detected at Bariloche over the period 2002-2012. The correlation coefficient between local data and corrected temperature reanalysis is at 99% confidence level (\*\*).

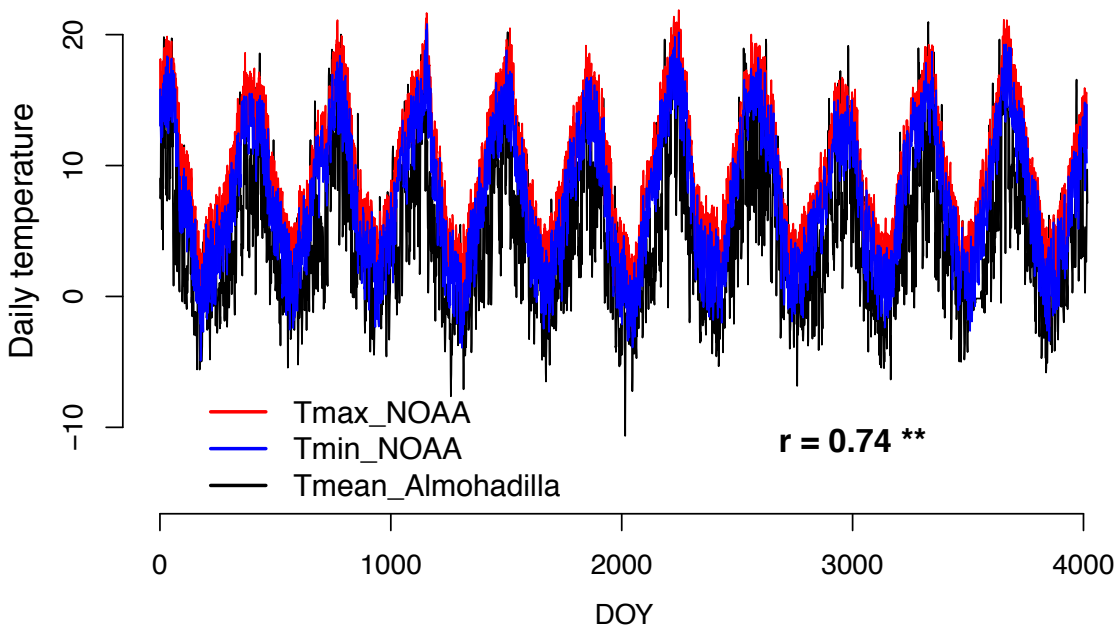

10  
11  
12

13 **Figure S2** Averaged monthly distribution of  $\delta^{18}\text{O}_p$  from GNIP data, GCM simulations  
14 (MUGCM and LMDZ-NCEP20) and estimated values from Eq. 2 in Quebec (A) and Argentina  
15 (B).

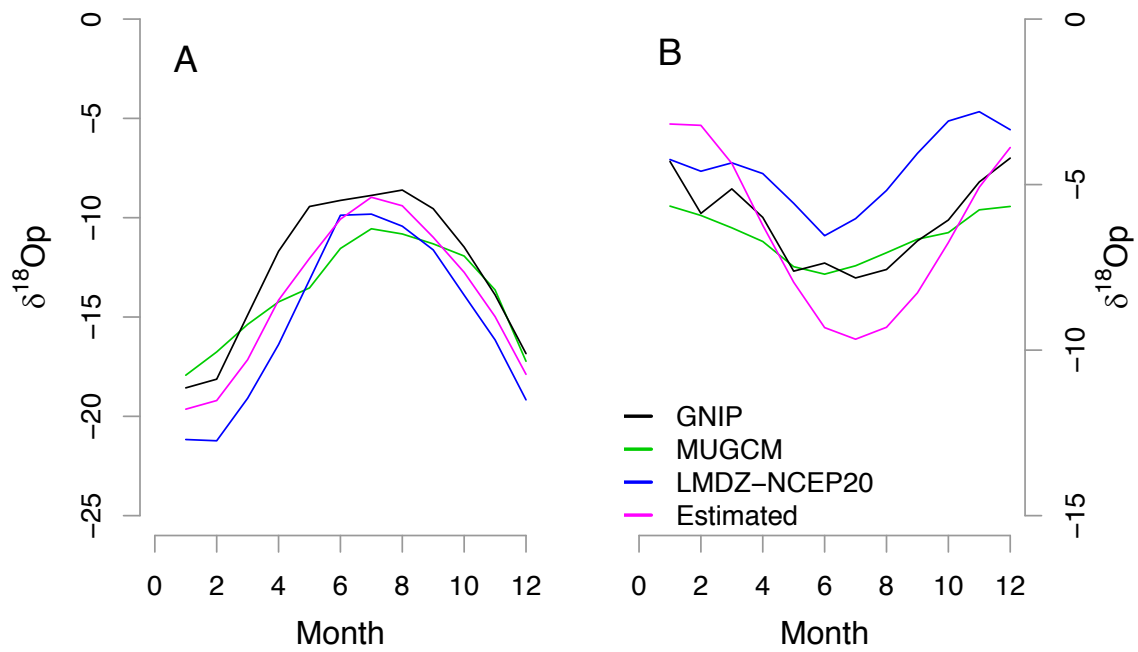

16  
17  
18  
19

20 **Figure S3** Posterior densities of the calibrated parameters ( $f_o$ ,  $\epsilon_0$ ,  $a$ ,  $b$  and  $\epsilon_k$ ) for Quebec  
 21 (black) and Argentina (red) computed over the whole period. The dashed lines are the posterior  
 22 densities of the calibrated parameters over two equal intervals (1950-1977 and 1978-2005 for *P.*  
 23 *mariana*; 1952-1981 and 1982-2011 for *N. pumilio*). Vertical lines are the values of a plausible  
 24 block of parameters retained in the MCMC optimization (see Table 1).

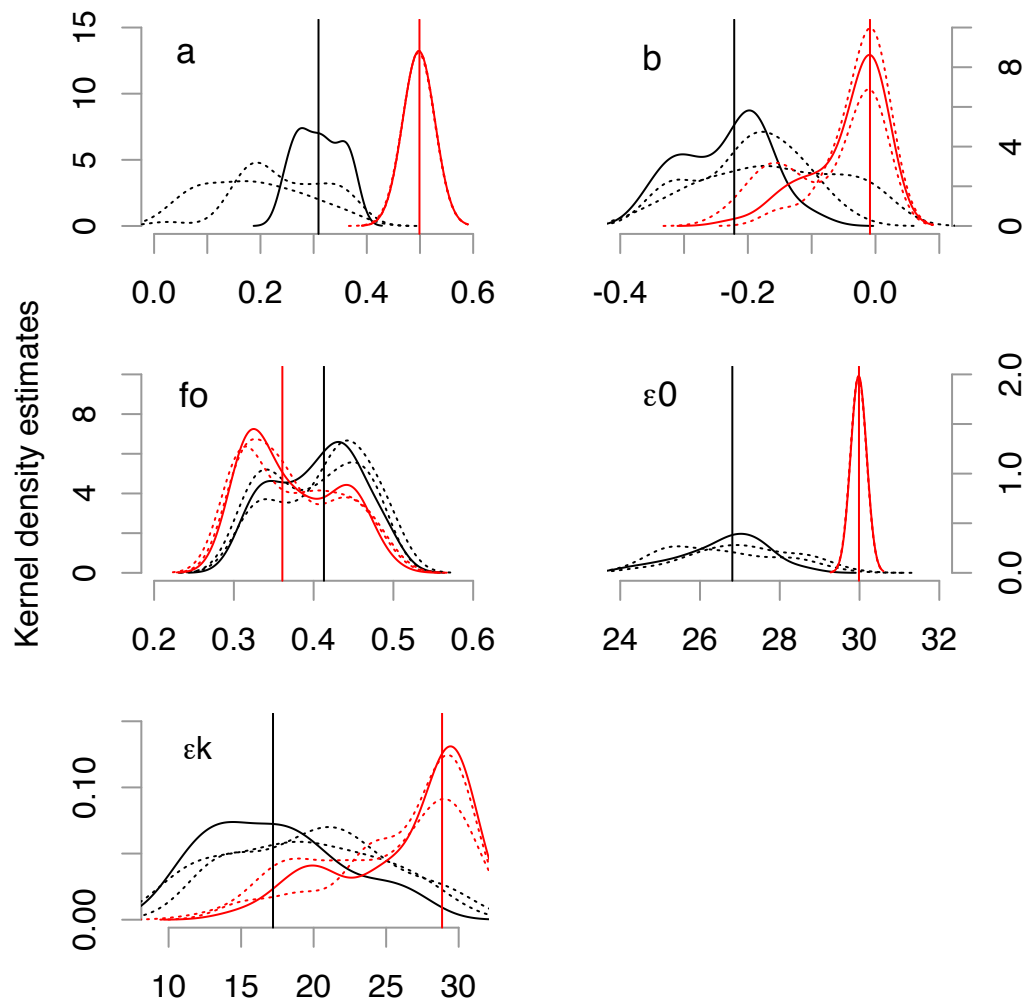

27 **Figure S4** Distribution of offset between simulated and observed values of  $\delta^{18}\text{O}_{\text{TR}}$ .  
28

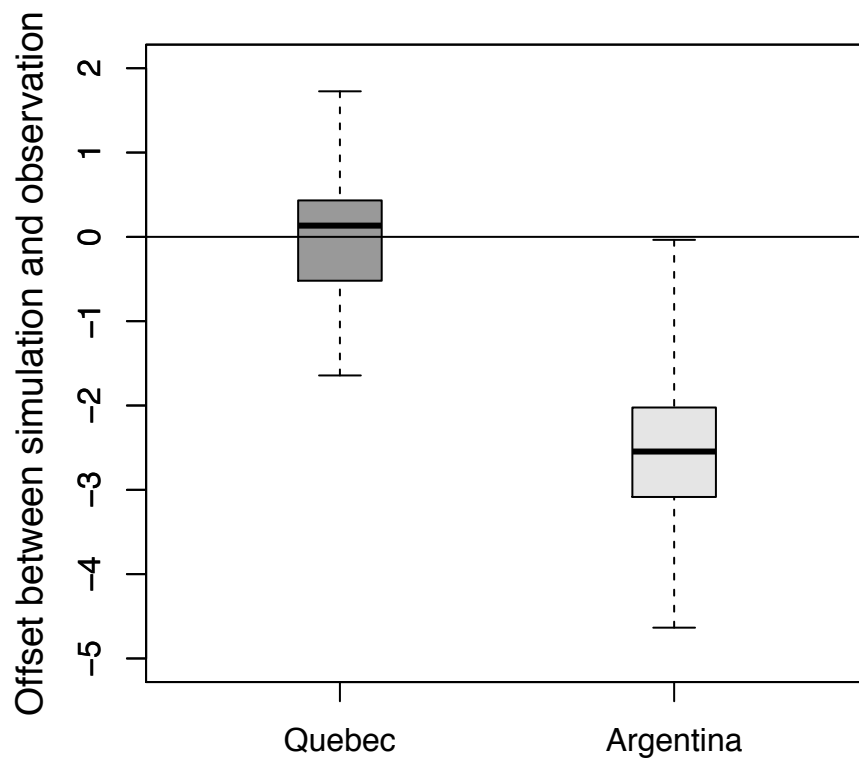

29  
30  
31
